# Supplementary material for: Development of a Clinical MALDI-ToF Mass Spectrometry Assay for SARS-CoV-2: Rational Design and Multi-Disciplinary Team Work
Source: MDPI journal article supplement (doi:10.3390/diagnostics10100746), 2020-09-24
Supplement: s1 [file s1]

A

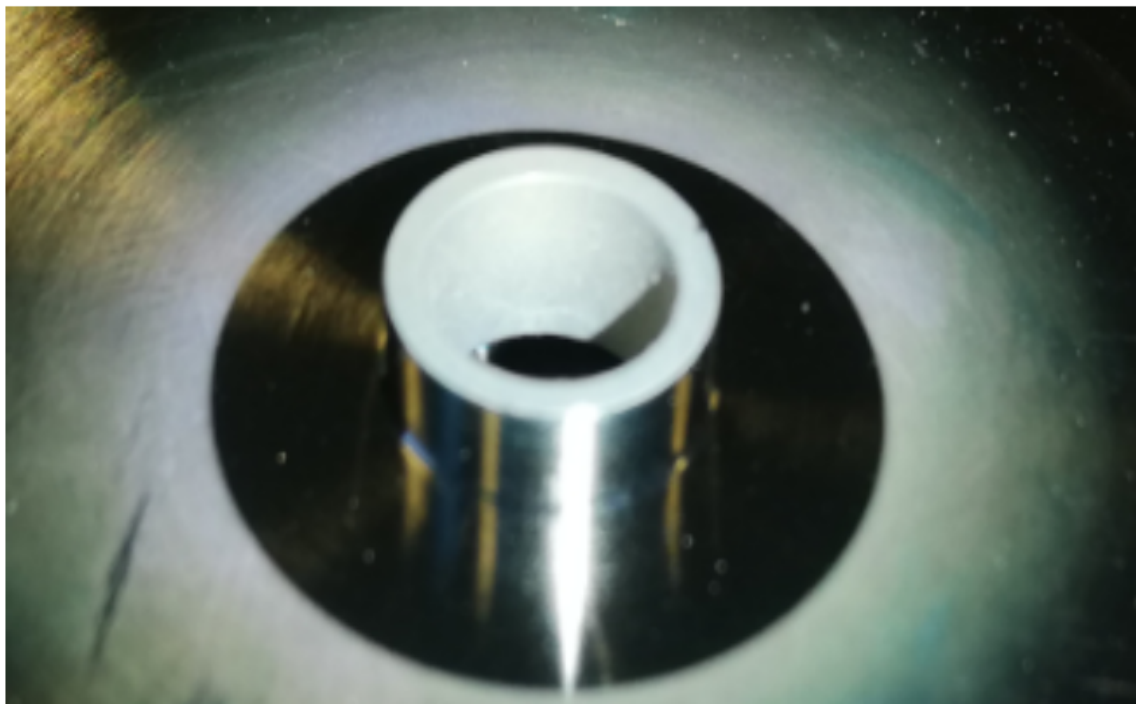

B

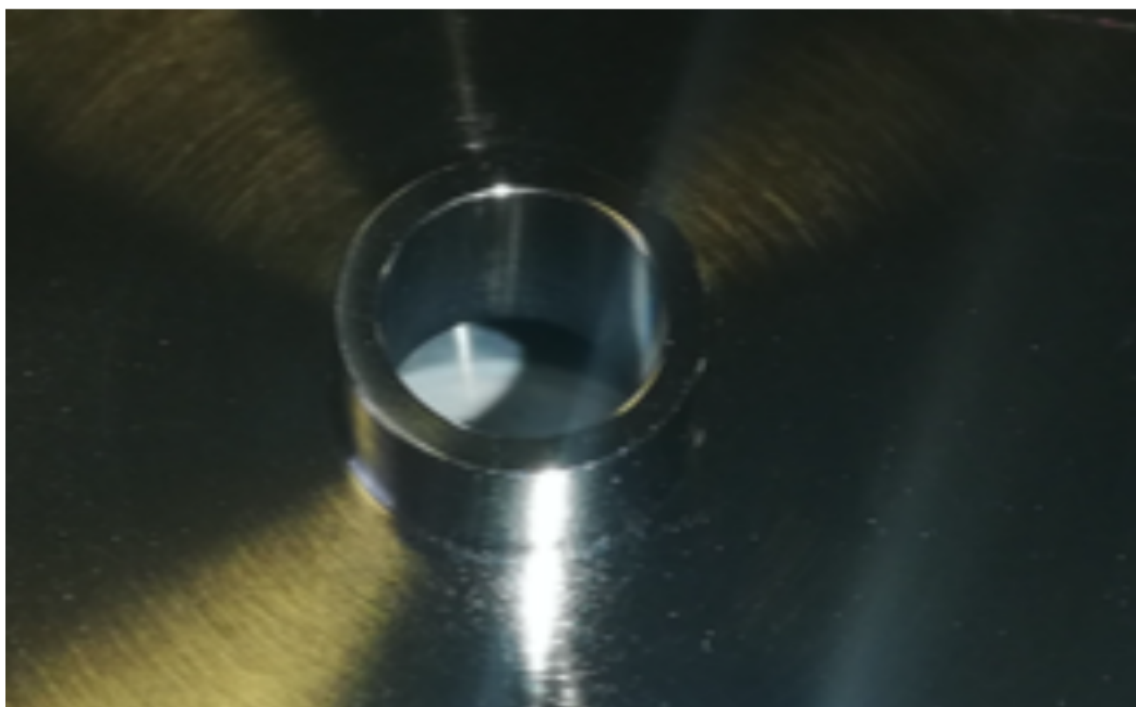

**Figure S1.** Fouling of primary lens from high throughput analysis of samples.
